# Supplementary material for: ML and ML2 complex formation between Ca(ii) and d-glucose derivatives in aqueous solutions
Source: Royal Society of Chemistry journal article supplement (doi:10.1039/c6dt04356a), 2016-12-13
Supplement: c6dt04356a1.pdf [file c6dt04356a1.pdf]

ELECTRONIC SUPPLEMENTARY MATERIAL

**ML and ML<sub>2</sub> Complexes Forming Between Ca(II) and D-glucose Derivatives in Aqueous Solutions**

Bence Kutus<sup>a,c</sup>, Dániel Ozsvár<sup>a,c</sup>, Norbert Varga<sup>a,c</sup>, István Pálinkó<sup>b,c</sup>, Pál Sipos<sup>\*a,c</sup>

<sup>a</sup> *Department of Inorganic and Analytical Chemistry, University of Szeged, Dóm tér 7, H-6720 Szeged, Hungary*

<sup>b</sup> *Department of Organic Chemistry, University of Szeged, Dóm tér 8, H-6720 Szeged, Hungary*

<sup>c</sup> *Material and Solution Structure Research Group, University of Szeged, Institute of Chemistry, H-6720 Szeged, Hungary*

\* Corresponding author: sipos@chem.u-szeged.hu

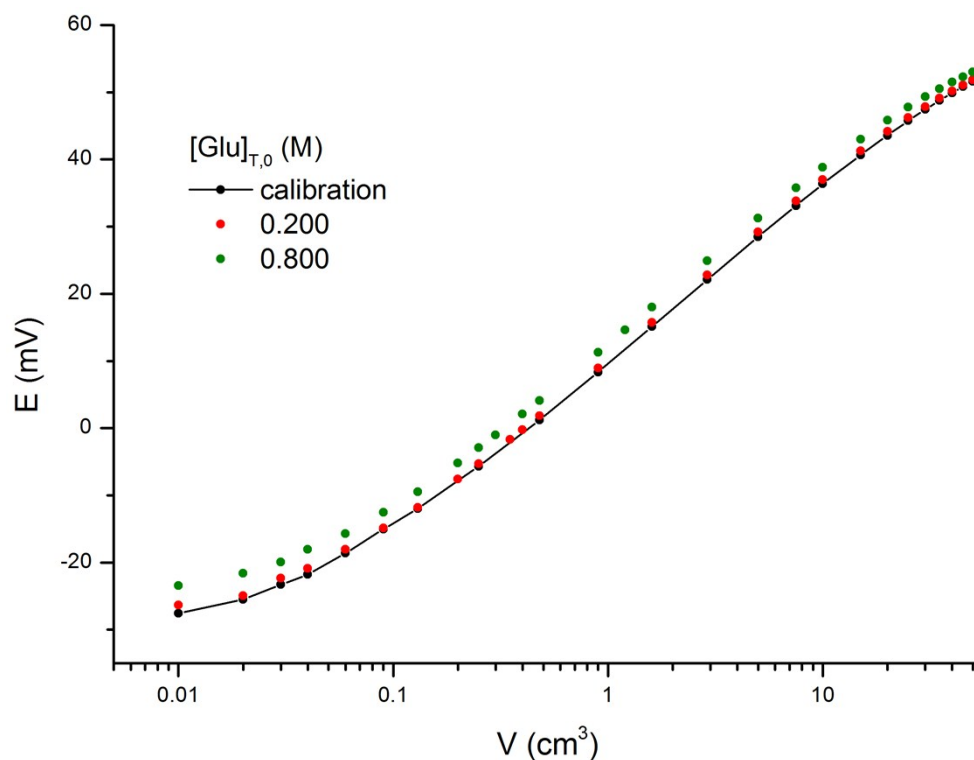

**Fig. S1** Ca-ISE titration curves for the system containing glucose (Glu). (Y axis: measured cell potential; X axis: the volume of the added titrant on a logarithmic scale.) Initial  $[\text{Ca}^{2+}]_{\text{T}} = 10^{-4} \text{ M}$ ; titrant concentration:  $[\text{CaCl}_2]_{\text{T}} = 0.2 \text{ M}$ ; initial volume:  $70 \text{ cm}^3$ .  $T = 25 \text{ }^\circ\text{C}$ ,  $I = 1 \text{ M}$ . For better visualization, the calibration points are linked with black solid line.

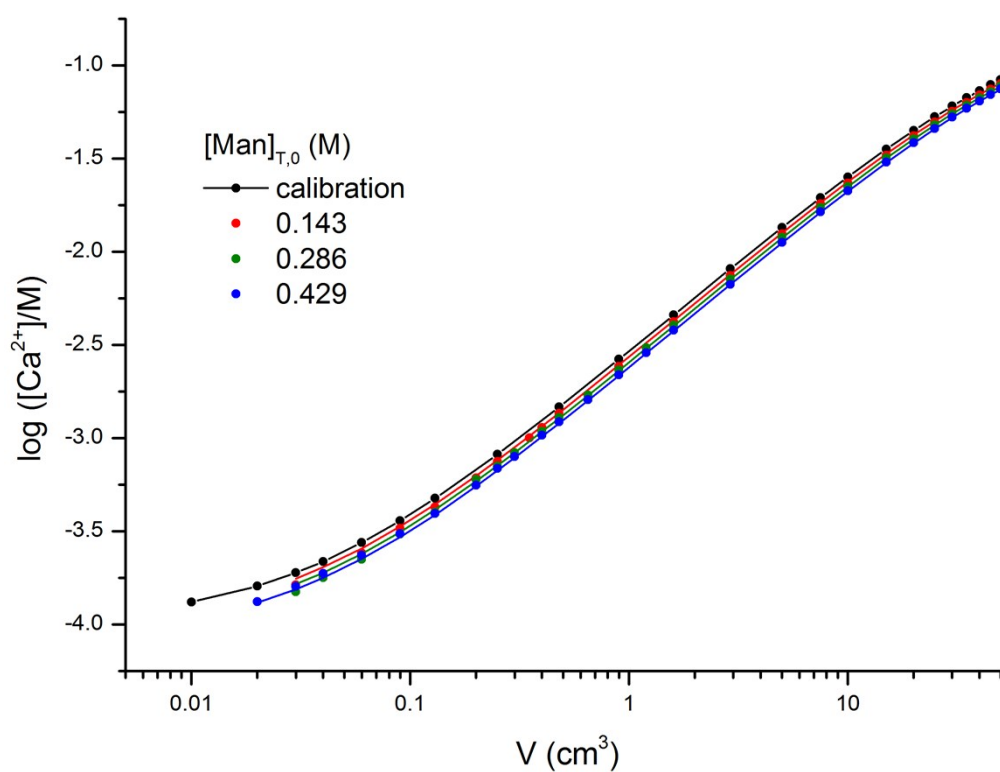

**Fig. S2** Ca-ISE titration curves for the system containing mannitol (Man). (Y axis: logarithm of the free calcium ion concentration,  $[\text{Ca}^{2+}]$ ; X axis: the volume of the added titrant on a logarithmic scale.) Initial

$[\text{Ca}^{2+}]_{\text{T}} = 10^{-4} \text{ M}$ ; titrant concentration:  $[\text{CaCl}_2]_{\text{T}} = 0.2 \text{ M}$ ; initial volume:  $70 \text{ cm}^3$ .  $T = 25 \text{ }^\circ\text{C}$ ,  $I = 1 \text{ M}$ . Symbols represent the measured, while solid lines represent the calculated points assuming the formation of the  $\text{CaMan}^{2+}$  complex ( $\log K_{1,1} = -0.28$ ). For better visualization, the calibration points are linked with solid line.

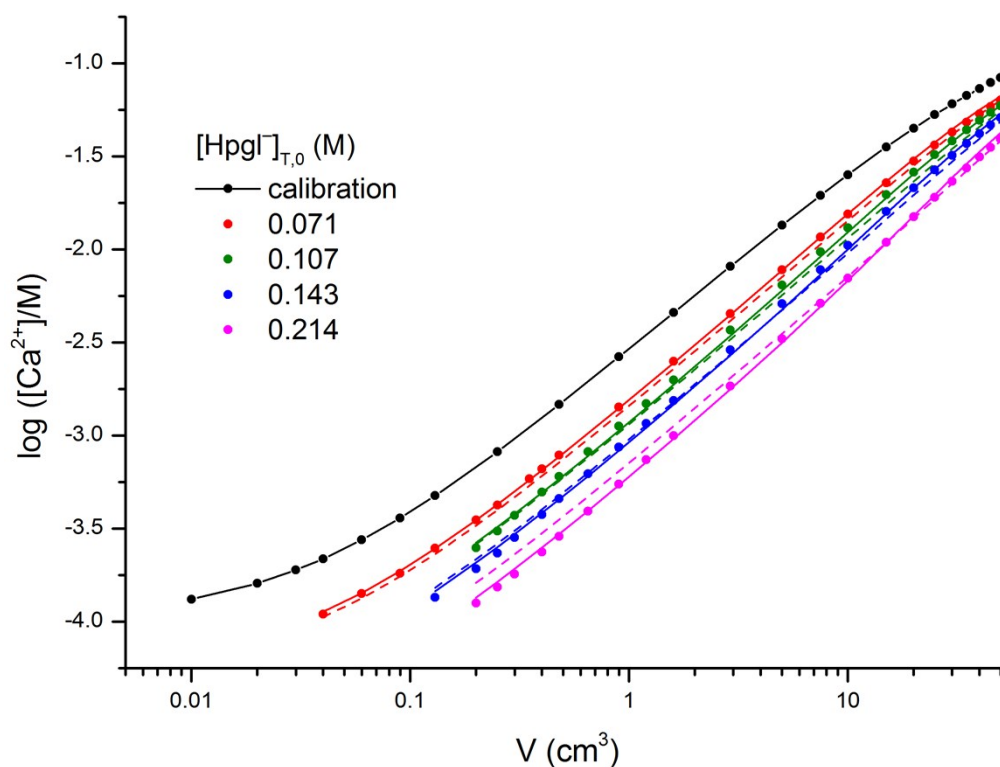

**Fig. S3** Ca-ISE titration curves for the system containing heptagluconate ( $\text{Hpgl}^-$ ). (Y axis: logarithm of the free calcium ion concentration,  $[\text{Ca}^{2+}]$ ; X axis: the volume of the added titrant on a logarithmic scale.) Initial  $[\text{Ca}^{2+}]_{\text{T}} = 10^{-4} \text{ M}$ ; titrant concentration:  $[\text{CaCl}_2]_{\text{T}} = 0.2 \text{ M}$ ; initial volume:  $70 \text{ cm}^3$ .  $T = 25 \text{ }^\circ\text{C}$ ,  $I = 1 \text{ M}$ . Symbols represent the measured points. Dashed lines: calculated assuming the formation of the  $\text{CaHpgl}^+$  complex ( $\log K_{1,1} = 1.17$ ); solid lines: calculated assuming the formation of the  $\text{CaHpgl}^+$  and  $\text{CaHpgl}_2^0$  complexes ( $\log K_{1,1} = 1.00$  and  $\log \beta_{1,2} = 1.61$ ). For better visualization, the calibration points are linked with solid line.

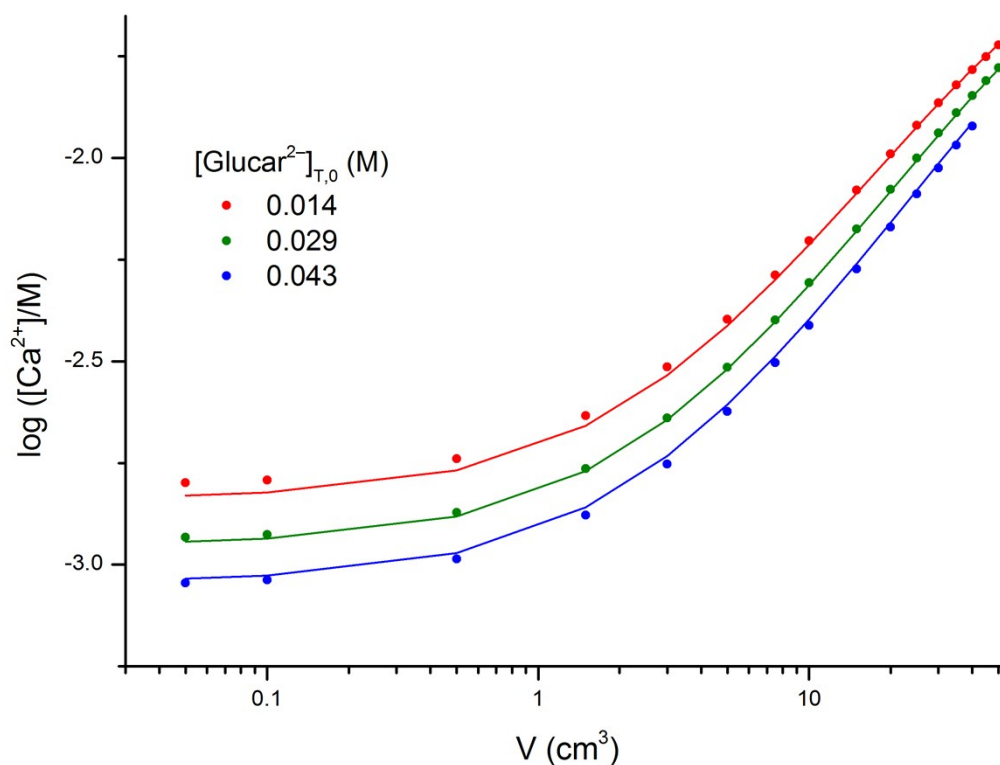

**Fig. S4** Ca-ISE titration curves for the system containing glucarate ( $\text{Glucar}^{2-}$ ). (Y axis: logarithm of the free calcium ion concentration,  $[\text{Ca}^{2+}]$ ; X axis: the volume of the added titrant on a logarithmic scale.) Initial  $[\text{Ca}^{2+}]_{\text{T}} = 10^{-4}$  M (calibration) and  $2 \cdot 10^{-3}$  M (measurements); titrant concentration:  $[\text{CaCl}_2]_{\text{T}} = 0.05$  M; initial volume:  $70 \text{ cm}^3$ .  $T = 25 \text{ }^\circ\text{C}$ ,  $I = 1$  M. Symbols represent the measured points, while solid lines represent the calculated points assuming the formation of the  $\text{CaGlucar}^0$  complex ( $\log K_{1,1} = 1.48$ ).

**Table S1** Freezing-point depression measurements for the system containing various amounts of  $\text{CaCl}_2$ ,  $\text{NaHpgl}$  or  $\text{CaHpgl}_2$ .  $\Delta\Delta T_f$  means the difference between the theoretical ( $\Delta T_{f,\text{theo}}$ , can be calculated by assuming complete dissociation of each compounds) and measured ( $\Delta T_{f,\text{meas}}$ ) freezing-point depression. This term is the measure of the decrease in the overall concentration.

| $[\text{NaHpgl}]_{\text{T}} (\text{M})$ | $[\text{CaCl}_2]_{\text{T}} (\text{M})$ | $[\text{CaHpgl}_2]_{\text{T}} (\text{M})$ | $\Delta T_{f,\text{theo}} (^\circ\text{C})$ | $\Delta T_{f,\text{meas}} (^\circ\text{C})$ | $\Delta\Delta T_f (^\circ\text{C})$ |
|-----------------------------------------|-----------------------------------------|-------------------------------------------|---------------------------------------------|---------------------------------------------|-------------------------------------|
| 0.100                                   | 0                                       | 0                                         | 0.37                                        | 0.39                                        | -0.02                               |
| 0.200                                   | 0                                       | 0                                         | 0.74                                        | 0.75                                        | -0.01                               |
| 0.300                                   | 0                                       | 0                                         | 1.11                                        | 1.06                                        | 0.05                                |
| 0                                       | 0.020                                   | 0                                         | 0.11                                        | 0.09                                        | 0.02                                |
| 0                                       | 0.036                                   | 0                                         | 0.20                                        | 0.20                                        | 0.00                                |
| 0                                       | 0.051                                   | 0                                         | 0.28                                        | 0.30                                        | -0.02                               |
| 0                                       | 0.076                                   | 0                                         | 0.42                                        | 0.40                                        | 0.02                                |
| 0                                       | 0.102                                   | 0                                         | 0.56                                        | 0.55                                        | 0.01                                |
| 0                                       | 0.152                                   | 0                                         | 0.85                                        | 0.81                                        | 0.04                                |
| 0                                       | 0.203                                   | 0                                         | 1.13                                        | 1.07                                        | 0.06                                |
| 0.100                                   | 0.020                                   | 0                                         | 0.48                                        | 0.47                                        | 0.01                                |
| 0.100                                   | 0.036                                   | 0                                         | 0.57                                        | 0.55                                        | 0.02                                |
| 0.100                                   | 0.051                                   | 0                                         | 0.65                                        | 0.55                                        | 0.10                                |
| 0.100                                   | 0.076                                   | 0                                         | 0.79                                        | 0.69                                        | 0.10                                |
| 0.100                                   | 0.102                                   | 0                                         | 0.93                                        | 0.77                                        | 0.16                                |
| 0.200                                   | 0.020                                   | 0                                         | 0.85                                        | 0.80                                        | 0.05                                |
| 0.200                                   | 0.036                                   | 0                                         | 0.94                                        | 0.83                                        | 0.11                                |
| 0.200                                   | 0.051                                   | 0                                         | 1.02                                        | 0.90                                        | 0.12                                |
| 0.200                                   | 0.076                                   | 0                                         | 1.16                                        | 0.99                                        | 0.17                                |

|       |       |       |      |      |      |
|-------|-------|-------|------|------|------|
| 0.200 | 0.102 | 0     | 1.30 | 1.10 | 0.20 |
| 0.300 | 0.102 | 0     | 1.67 | 1.28 | 0.39 |
| 0.300 | 0.152 | 0     | 1.96 | 1.51 | 0.45 |
| 0.300 | 0.203 | 0     | 2.24 | 1.71 | 0.53 |
| 0     | 0     | 0.020 | 0.11 | 0.06 | 0.05 |
| 0     | 0     | 0.040 | 0.22 | 0.16 | 0.06 |
| 0     | 0     | 0.080 | 0.44 | 0.27 | 0.17 |

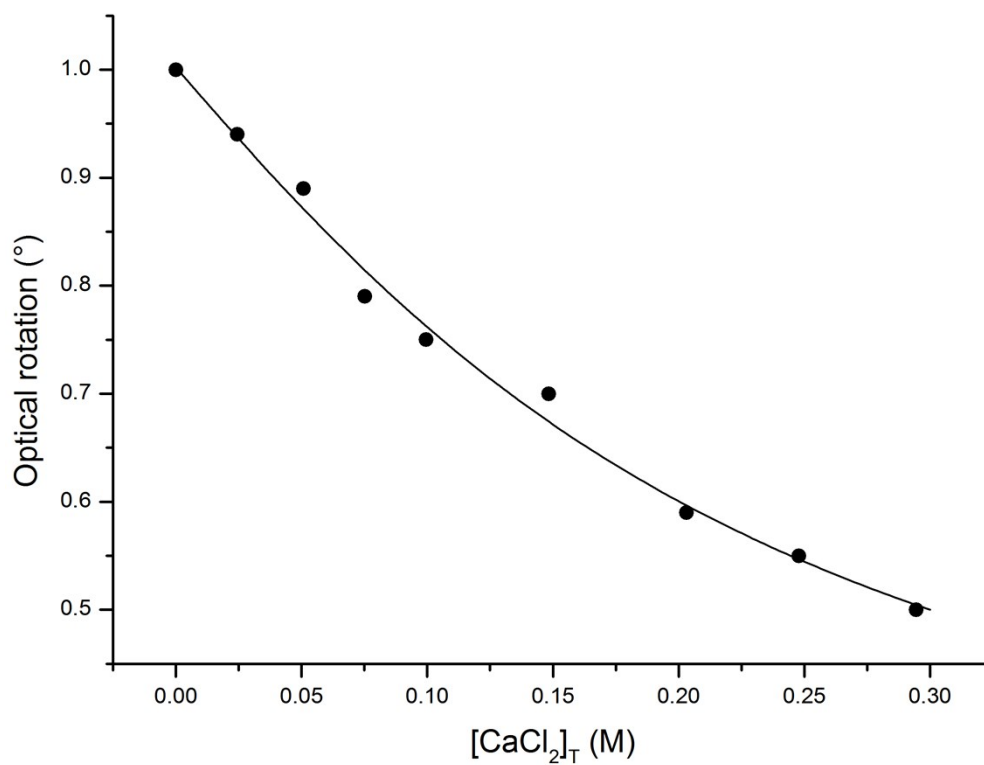

**Fig. S5** Variation of the optical rotation of an aqueous solution containing  $[\text{NaGluc}]_T = 0.200 \text{ M}$  as a function of the added  $\text{CaCl}_2$  concentration. Path length: 200 mm,  $T = (23 \pm 2) ^\circ\text{C}$ ,  $I = 1 \text{ M}$ . Symbols represent the measured points, while solid lines represent the calculated points assuming the formation of the  $\text{CaGluc}^+$  and  $\text{CaGluc}_2^0$  complexes ( $\log K_{1,1} = 1.08$  and  $\log \beta_{1,2} = 1.65$ ).

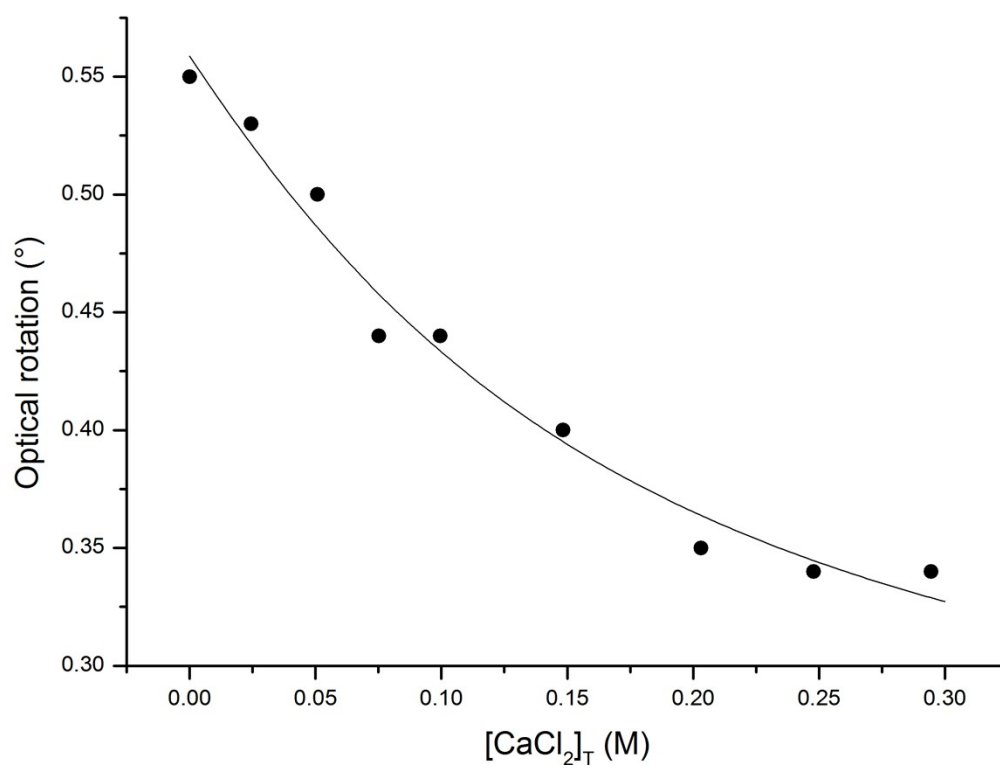

**Fig. S6** Variation of the optical rotation of an aqueous solution containing  $[\text{NaHpgl}]_{\text{T}} = 0.200 \text{ M}$  as a function of the added  $\text{CaCl}_2$  concentration. Path length: 200 mm,  $T = (23 \pm 2) ^\circ\text{C}$ ,  $I = 1 \text{ M}$ . Symbols represent the measured points, while solid lines represent the calculated points assuming the formation of the  $\text{CaHpgl}^+$  and  $\text{CaHpgl}_2^0$  complexes ( $\log K_{1,1} = 1.00$  and  $\log \beta_{1,2} = 1.61$ ).
